# Supplementary material
Source: PubMed Central journal article supplement (PMC3523192)
Supplement: NIHMS413992-supplement-1_si_001.pdf [file NIHMS413992-supplement-1_si_001.pdf]

*Supporting Information*

# MolFind: A Software Package Enabling HPLC/MS Based Identification of Chemical Structures

Lochana C. Menikarachchi<sup>†</sup>, Shannon Cawley<sup>†</sup>, Dennis W. Hill<sup>†</sup>, L. Mark Hall<sup>‡</sup>, Lowell Hall<sup>§</sup>,  
Steven Lai<sup>¶</sup>, Janine Wilder<sup>†</sup>, and David F. Grant<sup>\*,†</sup>

<sup>†</sup>Department of Pharmaceutical Sciences, University of Connecticut, Storrs, Connecticut, United States

<sup>‡</sup>Hall Associates Consulting, Quincy, Massachusetts, United States

<sup>§</sup>Department of Chemistry, Eastern Nazarene College, Quincy, Massachusetts, United States

<sup>¶</sup>Waters Corporation, Beverly, Massachusetts, United States

\*Corresponding author: Dr. David F. Grant, University of Connecticut, 69 N Eagleville Rd, Storrs, CT 06269. Phone (860)486-4265, Fax (860)486-5792, email: david.grant@uconn.edu

## Experimental Methods

### Chemicals

Trifluoroacetic acid, LC/MS grade methanol (Optima®), mefenamic acid, and 2,3,3a,4,5,7,8,9,9a,9b-decahydro-3-hydroxy-3a-methyl-1h-benz(e)inden-7-one were purchased from Sigma-Aldrich (St. Louis, MO). HPLC grade acetonitrile was purchased from Fisher Scientific (Hampton, NH) and HPLC grade heptafluorobutyric acid was purchased from Thermo Scientific (Rockford, IL). Nitromethane, nitroethane, *n*-nitropropane, *n*-nitrobutane, *n*-nitropentane, and *n*-nitrohexane were purchased from Aldrich (St. Louis, MO). A previously described method<sup>1</sup> was used to synthesize the remaining *n*-nitroalkanes; *n*-nitroheptane, *n*-nitrooctane, *n*-nitrononane, and *n*-nitrodecane. Reagent grade water was generated by a Barnstead Diamond® reverse-osmosis water purification system. Detailed information describing the compounds examined in this study, including their sources, can be found in table S1.

### Measurement of Retention Indices

The retention times of test compounds used in this study were determined on an Agilent 1100 HPLC system using a Zorbax Stable Bond, C-18, 1.0 mm x 150 mm (3.5 µm particle size) column at a flow rate of 75 µL/min with a linear solvent gradient from 0.76 mM heptafluorobutyric acid (HFBA) to 0.76 mM HFBA in 10% (v/v) water/acetonitrile. A Zorbax 1.0 mm x 17 mm (5 µm particle size) pre-column (Agilent, Santa Clara, CA) was used prior to the analytical column. The homologous series of *n*-nitroalkane retention index reference compounds were detected on an Agilent diode array detector at 210 nm and the test compounds were detected on a Qtof-2 (Waters, Beverly, MA) mass spectrometer using electrospray ionization in the positive ion mode and a mass range of 50 to 1000 Da. Ethisterone or uracil was

analyzed on both the uv detector and the mass spectrometer with each batch of analysis to determine the retention offset between the nitroalkane reference standards and the test compounds. Test mixture A (2-aminopyrimidine, aminoquinoline, p-anisidine, benzylamine, brucine, di-sec-butylamine, N-carbobenzyloxy-L-aspartic acid, 2-chloropyrazine, 2, 4, 6-collidine, cyclohexylamine, indole, 1-phenyl-3-pyrazolidinone, probenecid, quinine, and yohimbine) or B (2-aminopyrimidine, corticosterone, N, N-dimethylbenzamide, indomethacin, nicotinic acid, phenylbutazone, probenecid, tetraethylthiuram disulfide, thonzonium bromide) was analyzed with each batch of analysis to monitor retention index reproducibility. As previously described<sup>2</sup>, the retention time of each n-nitroalkane was assigned a retention index value 100 times the number of carbons in the respective reference compound. The retention indices of test compounds were assigned a value proportional to their retention times relative to the retention times of the n-nitroalkanes. The retention index of test compounds that eluted during the isocratic portion of the mobile phase were calculated by the interpolation of the log of the retention time of the test compounds relative to the log of the retention times of the n-nitroalkanes that eluted before and after the test compound. The relationships between the retention indices and retention times of the n-nitroalkanes that eluted during the gradient portion of the mobile phase were fitted to a 4<sup>th</sup> order polynomial equation. This equation was then used to calculate the retention indices of test compounds eluting during the linear gradient.

The model developed to predict RI values is specific for the HPLC system described in this study. The normalization of compound retention relative to a set of reference standards will correct retention times due to minor variability in mobile phase composition, column packing and chemistry, and solvent gradient profile. Since a reverse phase mode of retention was used for this system, very hydrophilic compounds will have very little retention and may elute in the

void volume. The predicted retention indices for these compounds will not differentiate between compounds of this type, but will differentiate between these compounds and other more hydrophobic candidate compounds with the same monoisotopic mass. An appropriate HPLC system, such as the use of a HILIC column in the normal phase mode, would need to be developed for the separation of very polar compounds and a new predictive retention model would have to be developed for this system.

### **Measurement of $E_{com50}$ Values**

Experimental  $E_{com50}$  values were obtained on the Qtof-2 mass spectrometer. The cone potential was set at 20 V and the collision energy was varied to determine experimental  $E_{com50}$  values. All other conditions remained identical to those described for the RI study. A Hamilton syringe pump (Reno, NV) was used to introduce samples into the positive ion electrospray source at a flow rate of 5  $\mu$ L/min. Stock solutions for each of the compounds were prepared at a concentration of 10  $\mu$ mol/mL in an appropriate solvent based on solubility determined by predicted LogP values provided in PubChem. Test solutions for this study were prepared using the stock solutions of four compounds, each separated in mass by at least 6 Da, and diluted to a final concentration of 10 nmol/mL, in 0.01% (v/v) trifluoroacetic acid in acetonitrile/water (1:1, v/v). If a sample appeared to saturate the micro-channel plate (MCP) detector on the mass spectrometer, it was diluted accordingly. A few samples were prepared and run individually due to their instability or potential interaction with other compounds in their respective mixtures. The molecular ion of each protonated compound was isolated and subjected to CID in the collision cell using argon as the collision gas. The CID spectra of each compound were determined at odd collision energies from 1 eV to 39 eV. The spectra for each test compound at each collision energy were co-added and processed by smoothing, centering and eliminating noise below a 1%

threshold using Masslynx<sup>®</sup> software. The collision energy at 50% survival yield (CE<sub>50</sub>) was calculated and converted to the center of mass energy at 50% survival yield (E<sub>com50</sub>) as described<sup>3</sup>. If early parent ion fragmentation resulted in a fast-decaying survival yield curve, the sample was analyzed again at unit collision energies from 1 eV to 20 eV and the data was processed in the same manner.

### **Drift Time Measurements**

A Synapt G2 HDMS (Waters, Beverly, MA) mass spectrometer was operated in ion mobility mode, using positive electrospray ionization (ESI). Leucine-enkephalin was used as the single point lock mass calibrant. The capillary voltage was adjusted as necessary to obtain the desired sample peak intensity and ranged from 0.5 kV to 4.2 kV. The system was operated with a sample cone potential of 40 V and an extraction cone potential of 60 V. The source block temperature was set at 80°C and the desolvation temperature at 200°C. The trap T-wave cell was operated with a potential of 4.0 eV and an argon pressure of  $1.52 \times 10^{-2}$  mbar. The ion mobility cell was maintained at a pressure of 2.23 mbar (N<sub>2</sub>), with a traveling wave speed of 1800 m/s, and pulse amplitude of 40 V. Test compounds were prepared individually at concentrations ranging from 0.1 to 100 nmol/mL in 0.01% TFA (v/v) in methanol, water, or methanol/water (1:1, v/v), based on their LogP value. These samples were introduced into the source by flow injection using a Hamilton syringe pump (Reno, NV) operated at a flow rate of 5  $\mu$ L/min. Data was acquired in the continuum mode over a mass range of 50-1200 Da, for a period of 10 milliseconds. The reconstructed precursor ion drift peak was smoothed and integrated to determine the drift time for each test compound.

(1) Aderjan, R.; Bogusz, M. *J. Chromatogr. A*. **1988**, *454*, 345–351.

- (2) Hall, L. M.; Hall, L. H.; Kertesz, T. M.; Hill, D. W.; Sharp, T. R.; Oblak, E. Z.; Dong, Y. W.; Wishart, D. S.; Chen, M.-H.; Grant, D. F. *J. Chem. Inf. Model.* **2012**, *52*, 1222–1237.
- (3) Kertesz, T. M.; Hall, L. H.; Hill, D. W.; Grant, D. F. *J. Am. Soc. Mass Spectrom.* **2009**, *20*, 1759–1767.

**Table S1. Experimental Data**

| <b>Test Compound</b>         | <b>PubChem ID</b> | <b>MIMW</b> | <b>Exp RI</b> | <b>Exp ECOM<sub>50</sub> (eV)</b> | <b>Exp Drift Time (msec)</b> | <b>Compound Source</b>   |
|------------------------------|-------------------|-------------|---------------|-----------------------------------|------------------------------|--------------------------|
| 6a-Methylprednisolone        | 4159              | 374.2093    | 397           | 0.77                              | 5.89                         | Sigma                    |
| Adiphenine                   | 2031              | 311.1885    | 428           | 1.80                              | 5.18                         | Sigma (as HCl)           |
| Albuterol (Salbutamol)       | 2083              | 239.1521    | 270           | 1.25                              | 4.16                         | Sigma                    |
| Amfenac                      | 2136              | 255.0895    | 453           | 1.46                              | 4.10                         | Sigma                    |
| Aminophylline (Theophylline) | 2153              | 180.0647    | 252           | 3.01                              | 2.97                         | Sigma                    |
| Ampicillin                   | 2174              | 349.1096    | 289           | 1.06                              | 5.67                         | Sigma                    |
| Antipyrine                   | 2206              | 188.0950    | 306           | 3.37                              | 3.19                         | Sigma                    |
| Antipyrine-4-amino           | 2151              | 203.1059    | 280           | 1.98                              | 3.40                         | Sigma                    |
| Bumetanide                   | 2471              | 364.1093    | 501           | 1.24                              | 5.08                         | Alltech Associates       |
| Cromolyn                     | 2882              | 468.0693    | 255           | 0.86                              | 7.18                         | MP Biomedicals (as Na)   |
| Cymarin                      | 539061            | 548.2985    | 369           | 0.54                              | 9.29                         | MP Biomedicals           |
| Daunorubicin                 | 2958              | 527.1791    | 383           | 0.48                              | 8.37                         | Sigma (as HCl)           |
| Dihydroergotamine            | 3066              | 583.2795    | 388           | 1.40                              | 8.91                         | Sigma (as Tartrate)      |
| Diphenoxylate                | 13505             | 452.2464    | 549           | 2.29                              | 7.72                         | Alltech Associates       |
| Doxorubicin (Adriamycin)     | 1691              | 543.1741    | 350           | 0.53                              | 8.75                         | Sigma (as HCl)           |
| Enalapril                    | 3222              | 376.1998    | 368           | 1.46                              | 5.89                         | Sigma                    |
| Enalaprilat                  | 5362033           | 348.1685    | 289           | 1.47                              | 5.35                         | Sigma                    |
| Ephedrine                    | 5032              | 165.1154    | 289           | 1.67                              | 3.08                         | West-Ward Pharmaceutical |
| Ergocristine                 | 98255             | 609.2951    | 437           | 0.69                              | 9.72                         | Sigma (as HCl)           |
| Fenoterol                    | 3343              | 303.1471    | 290           | 1.56                              | 4.91                         | Sigma                    |
| Ketorolac                    | 3826              | 255.0895    | 418           | 1.82                              | 4.10                         | Sigma                    |
| Leucine Enkephalin           | 3903              | 555.2693    | 332           | 1.08                              | 8.75                         | Sigma                    |
| Methionine Enkephalin        | 42785             | 573.2257    | 317           | 1.03                              | 8.86                         | Sigma (as Acetate)       |
| Methotrexate                 | 4112              | 454.1713    | 287           | 1.12                              | 6.53                         | Sigma                    |
| Methylegonovine              | 4140              | 339.1947    | 308           | 1.93                              | 5.62                         | Sigma (as Maleate)       |
| Nimesulide                   | 4495              | 308.0467    | 549           | 1.67                              | 4.75                         | Sigma                    |
| Noscapine                    | 4544              | 413.1474    | 357           | 1.56                              | 6.32                         | Sigma                    |
| Oxaprozin                    | 4614              | 293.1052    | 554           | 1.69                              | 4.86                         | Sigma                    |

|                                                                          |          |          |      |      |      |                                       |
|--------------------------------------------------------------------------|----------|----------|------|------|------|---------------------------------------|
| Oxybutynin                                                               | 4634     | 357.2304 | 469  | 1.99 | 5.83 | Sigma                                 |
| Oxytetracycline                                                          | 54675779 | 460.1482 | 306  | 0.91 | 6.53 | Sigma                                 |
| Perindopril                                                              | 107807   | 368.2311 | 374  | 1.53 | 5.99 | Sigma                                 |
| Piperacetazine                                                           | 19675    | 410.2028 | 412  | 1.90 | 6.64 | Sigma                                 |
| Poldine*                                                                 | 11018    | 340.1913 | 366  | 2.29 | 5.45 | Theta (as Methylsulfate)              |
| Prazosin                                                                 | 4893     | 383.1594 | 335  | 2.40 | 6.26 | Sigma                                 |
| Prednisolone                                                             | 4894     | 360.1937 | 366  | 0.78 | 5.62 | Sigma                                 |
| Prednisolone Tebutate                                                    | 4898     | 458.2668 | 723  | 0.38 | 7.61 | United States Pharmacopeia            |
| Prednisone                                                               | 4900     | 358.1780 | 368  | 1.02 | 5.56 | Sigma                                 |
| Prolintane                                                               | 14592    | 217.1830 | 369  | 2.65 | 3.83 | Boehringer Ingelheim & Rhein (as HCl) |
| Sulfadimethoxine                                                         | 5323     | 310.0736 | 358  | 1.90 | 4.75 | Sigma                                 |
| Tenoxicam                                                                | 54677971 | 337.0191 | 334  | 1.49 | 4.91 | Sigma                                 |
| Terbutaline                                                              | 5403     | 225.1365 | 272  | 1.73 | 3.94 | MP Biomedicals (as Hemisulfate)       |
| Terfenadine                                                              | 5405     | 471.3137 | 572  | 1.50 | 8.64 | Sigma                                 |
| Thioridazine                                                             | 5452     | 370.1537 | 516  | 1.95 | 5.78 | Sigma                                 |
| Thonzonium Bromide                                                       | 5456     | 511.4376 | 1217 | 0.99 | 9.67 | Sigma                                 |
| Tyramine (Hydroxyphenethylamine)                                         | 5610     | 137.0841 | 257  | 1.25 | 2.48 | Sigma                                 |
| Methimazole                                                              | 1349907  | 114.0252 | N/A  | N/A  | 2.30 | Chembridge                            |
| 1-methylpiperidin-4-amine                                                | 2737531  | 114.1157 | N/A  | N/A  | 2.32 | Chembridge                            |
| 2-methyl-4(3H)-quinazolinone                                             | 15674    | 160.0637 | N/A  | N/A  | 2.81 | Chembridge                            |
| (3-methylpiperidin-1-yl)acetic acid                                      | 3163244  | 157.1103 | N/A  | N/A  | 2.89 | Chembridge                            |
| 1,2,3-trimethyl-4-phenyl-piperidin-4-ol                                  | 2838298  | 219.1623 | N/A  | N/A  | 3.68 | Chembridge                            |
| 1,3-dimethyl-N-(5-methyl-3-isoxazolyl)-1H-pyrazole-4-sulfonamide         | 6466738  | 256.0630 | N/A  | N/A  | 3.97 | Chembridge                            |
| 3-[[[(cyclopentylmethyl)amino]methyl]-N,N-diethyl-2-pyridinamine         | 28389621 | 261.2205 | N/A  | N/A  | 4.48 | Chembridge                            |
| N-(1-butyl-4-methyl-1H-pyrazol-5-yl)-2-phenyl-1H-imidazole-4-carboxamide | 46995060 | 323.1746 | N/A  | N/A  | 5.59 | Chembridge                            |
| N-(3-acetylphenyl)-3-methyl-2-phenyl-quinoline-4-carboxamide             | 1313097  | 380.1525 | N/A  | N/A  | 5.94 | Chembridge                            |
| N-{4-[(mesitylamino)sulfonyl]phenyl}-2-methylbenzamide                   | 2910668  | 408.1508 | N/A  | N/A  | 6.89 | Chembridge                            |



|                                                                                                                |          |            |     |     |      |            |
|----------------------------------------------------------------------------------------------------------------|----------|------------|-----|-----|------|------------|
| N-(2-ethoxyphenyl)-3-methyl-2-(4-methylphenyl)quinoline-4-carboxamide                                          | 2168581  | 396.1838   | N/A | N/A | 6.78 | Chembridge |
| N-[[2-[(cyclohexylmethyl)sulfonyl]-1-(2-methoxyethyl)-1H-imidazol-5-yl]methyl]-N,3-dimethyl-1-butanamine       | 42514440 | 399.255563 | N/A | N/A | 6.97 | Chembridge |
| 4-[[[(3,4-dimethylphenyl)(methylsulfonyl)amino]methyl]-N-(2-methylbenzyl)benzamide                             | 1350894  | 436.1821   | N/A | N/A | 7.83 | Chembridge |
| 3-propoxy-N-{4-[4-(2-thienylcarbonyl)-1-piperazinyl]phenyl}benzamide                                           | 2987700  | 449.1773   | N/A | N/A | 8.26 | Chembridge |
| N-[2-(benzoylamino)benzoyl]-N-(1,5-dimethyl-3-oxo-2-phenyl-2,3-dihydro-1H-pyrazol-4-yl)phenylalaninamide       | 2902191  | 573.2376   | N/A | N/A | 9.29 | Chembridge |
| 3,3'-(2,2-propanediylbis[4,1-phenyleneoxy(2-hydroxy-3,1-propanediyl)])bis(5,5-dimethyl-2,4-imidazolidinedione) | 2884368  | 596.2846   | N/A | N/A | 9.13 | Chembridge |

**Table S2. Effective Drift Times for Poly-Alanine Standards**

| <b>No of Ala</b> | <b>m/z</b> | <b>He Drift Tube Derived Cross Sectional Area (Å<sup>2</sup>)</b> | <b>Mass Independent Cross Sectional Area (Å<sup>2</sup>)</b> | <b>Average Effective Drift Time (milliseconds)</b> |
|------------------|------------|-------------------------------------------------------------------|--------------------------------------------------------------|----------------------------------------------------|
| 3                | 232.1297   | 89.0                                                              | 176.5                                                        | 3.90                                               |
| 4                | 303.1668   | 102.9                                                             | 204.5                                                        | 4.64                                               |
| 5                | 374.2039   | 115.0                                                             | 228.9                                                        | 5.52                                               |
| 6                | 445.2411   | 127.0                                                             | 252.9                                                        | 6.43                                               |
| 7                | 516.2782   | 140.5                                                             | 280.0                                                        | 7.42                                               |
| 8                | 587.3153   | 155.5                                                             | 310.0                                                        | 8.64                                               |
| 9                | 658.3524   | 167.9                                                             | 334.9                                                        | 9.78                                               |

**Table S3. Molecular Descriptors used in random forest models**

| <b>Descriptor</b> | <b>Definition</b>                                                                                    | <b>Class*</b> |
|-------------------|------------------------------------------------------------------------------------------------------|---------------|
| VP.0              | Chi path - valence path of order 0                                                                   | 2D            |
| VABC              | Van der Waals volume                                                                                 | 2D            |
| ECCEN             | Eccentric connectivity index - A topological descriptor combining distance and adjacency information | 2D            |
| apol              | Sum of atomic polarizabilities                                                                       | 2D            |
| MOMI.Y            | Moment of inertia along y-axis                                                                       | 3D            |
| MobCSA            | Mobcal cross sectional area                                                                          | 3D            |
| WPATH             | Wiener path number                                                                                   | 2D            |
| VP.1              | Chi path - valence path of order 1                                                                   | 2D            |
| SP.1              | Chi path - simple path of order 1                                                                    | 2D            |
| GRAVH.2           | Square root of hydrogen-included gravitational index                                                 | 3D            |
| GRAVH.1           | Gravitational index - hydrogens included                                                             | 3D            |
| WA.unity          | Unit weighted WHIM size descriptor – Quadratic contribution to the total dimension of the molecule   | 3D            |
| WTPT.1            | Weighted path of order 1                                                                             | 2D            |
| SP.0              | Chi path -simple path of order 0                                                                     | 2D            |
| MOMI.X            | Moment of inertia along x-axis                                                                       | 3D            |
| WV.unity          | Unit weighted WHIM size descriptor – Linear contribution to the total dimension of the molecule      | 3D            |
| VAdjMat           | Vertex adjacency information                                                                         | 2D            |
| nB                | Bond count - number of bonds of a certain bond order                                                 | 2D            |
| WT.unity          | Unit weighted WHIM size descriptor – Total contribution to the size                                  | 3D            |
| ATSp1             | Autocorellation polarizability of lag 1                                                              | 2D            |
| GRAVH.3           | Cube root of hydrogen-included gravitational index                                                   | 3D            |
| nAtom             | Atom count                                                                                           | 2D            |
| Kier1             | Kappa shape indices                                                                                  | 2D            |
| WPSA.1            | Charged partial surface area                                                                         | 3D            |
| Zagreb            | Zagreb index - sum of the squared atom degree of all heavy atoms                                     | 2D            |

|        |                                                      |    |
|--------|------------------------------------------------------|----|
| MOMI.Z | Moment of inertia along z-axis                       | 3D |
| ATSm1  | Autocorellation mass of lag 1                        | 2D |
| SP.2   | Chi path - simple path of order 2                    | 2D |
| ATSp2  | Autocorellation polarizability of lag 2              | 2D |
| GRAV.6 | Grav3 for all pairs of atoms (not just bonded pairs) | 3D |
| MOMI.R | Radius of gyration                                   | 3D |
| GRAV.5 | Grav2 for all pairs of atoms (not just bonded pairs) | 3D |
| Kler2  | Kappa shape indices                                  | 2D |
| VP.2   | Chi path - valence path of order 2                   | 2D |
| ATSm2  | Autocorellation mass of lag 2                        | 2D |
| SP.4   | Chi path - simple path of order 4                    | 2D |
| VP.7   | Chi path - valence path of order 7                   | 2D |
| fragC  | Fragment complexity                                  | 2D |
| SP.3   | Chi path - simple path of order 3                    | 2D |
| GRAV.4 | Grav1 for all pairs of atoms (not just bonded pairs) | 3D |
| VP.3   | Chi path - valence path of order 3                   | 2D |

---

\* 3D – requires a 3D (xyz coordinates) representation of the structure. 2D – only molecular graph (connectivity between atoms) is needed

Table S4. Reproducibility of RI

| Date       | Nicotinic acid | N,N-dimethylbenzamide | Corticosterone | Probenecid | Indomethacin | Phenylbutazone | Tetraethylthiuram disulfide | Thonzonium |
|------------|----------------|-----------------------|----------------|------------|--------------|----------------|-----------------------------|------------|
| 3/2/12     | 105            | 318                   | 433            | 523        | 610          | 662            | 756                         | 1222       |
| 3/5/12     | 104            | 317                   | 432            | 524        | 610          | 663            | 758                         | 1222       |
| 3/6/12     | 105            | 318                   | 432            | 524        | 610          | 663            | 757                         | 1220       |
| 3/7/12     | 106            | 318                   | 433            | 524        | 609          | 663            | 757                         | 1228       |
| 3/8/12     | 106            | 318                   | 434            | 524        | 611          | 664            | 757                         | 1222       |
| 3/9/12     | 104            | 318                   | 434            | 526        | 612          | 665            | 760                         | 1219       |
| 3/12/12    | 107            | 319                   | 434            | 525        | 610          | 663            | 760                         | 1223       |
| 3/13/12    | 104            | 318                   | 434            | 526        | 613          | 667            | 761                         | 1222       |
| 3/13/12    | 106            | 318                   | 433            | 526        | 612          | 665            | 760                         | 1224       |
| 3/13/12    | 105            | 318                   | 434            | 526        | 612          | 666            | 760                         | 1222       |
| 3/13/12    | 106            | 319                   | 433            | 525        | 611          | 664            | 759                         | 1220       |
| 3/13/12    | 107            | 318                   | 433            | 526        | 612          | 666            | 760                         | 1224       |
| 3/14/12    | 102            | 318                   | 433            | 523        | 610          | 663            | 757                         | 1216       |
| 3/19/12    | 105            | 318                   | 434            | 525        | 612          | 664            | 759                         | 1226       |
| 3/21/12    | 101            | 318                   | 433            | 523        | 609          | 663            | 757                         | 1218       |
| 3/23/12    | 105            | 319                   | 434            | 525        | 610          | 664            | 756                         | 1223       |
| <b>STD</b> | 1.74           | 0.47                  | 0.60           | 1.19       | 1.19         | 1.31           | 1.61                        | 2.93       |

**Table S5. Reproducibility of ECOM<sub>50</sub> (eV)**

| <b>Date</b> | <b>Ampicillin</b> | <b>Isoxsuprine</b> | <b>Drofenine</b> | <b>Tetramisole</b> |
|-------------|-------------------|--------------------|------------------|--------------------|
| 5/18/12     | 1.09              | 1.27               | 1.97             | 3.26               |
| 5/21/12     | 1.09              | 1.26               | 1.98             | 3.27               |
| 5/22/12     | 1.10              | 1.27               | 1.98             | 3.26               |
| 5/23/12     | 1.09              | 1.26               | 1.98             | 3.28               |
| 5/29/12     | 1.08              | 1.26               | 1.98             | 3.25               |
| 5/30/12     | 1.09              | 1.26               | 1.99             | 3.29               |
| 5/31/12     | 1.08              | 1.26               | 1.98             | 3.27               |
| 6/1/12      | 1.09              | 1.26               | 1.98             | 3.26               |
| 6/2/12      | 1.10              | 1.27               | 1.98             | 3.26               |
| 6/4/12      | 1.09              | 1.26               | 1.98             | 3.26               |
| <b>STD</b>  | 0.01              | <0.01              | <0.01            | 0.01               |

Table S6. Rankings for Old Bins

| Test Compound                       | 22%<br>prec<br>CID<br>energy | After<br>pre<br>filters | After<br>RI | After<br>ECOM <sub>50</sub> | Mass<br>Frontie<br>r rank<br>after<br>pre<br>filters | Mass<br>Frontier<br>rank after<br>RI and<br>ECOM <sub>50</sub> | MetFrag<br>peaks<br>rank (22%<br>prec CID<br>spectra) | MetFrag<br>score<br>rank (22%<br>prec CID<br>spectra) | MetFrag<br>peaks rank<br>(composite<br>spectra) | MetFrag<br>score rank<br>(composite<br>spectra) | MetFrag<br>score rank<br>(intensity<br>corrected<br>composite<br>spectra) |
|-------------------------------------|------------------------------|-------------------------|-------------|-----------------------------|------------------------------------------------------|----------------------------------------------------------------|-------------------------------------------------------|-------------------------------------------------------|-------------------------------------------------|-------------------------------------------------|---------------------------------------------------------------------------|
| 6a-Methylprednisolone               | 20                           | 186                     | 156         | 129                         | 11                                                   | 9                                                              | 6                                                     | 2                                                     | 10                                              | 3                                               | 3                                                                         |
| Adiphenine                          | 20                           | 599                     | 588         | 585                         | 6                                                    | 6                                                              | 6                                                     | 6                                                     | 15                                              | 5                                               | 4                                                                         |
| Albuterol                           | 20                           | 137                     | 117         | 99                          | 15                                                   | 14                                                             | 9                                                     | 33                                                    | 3                                               | 3                                               | 7                                                                         |
| Amfenac                             | 30                           | 334                     | 252         | 246                         | 11                                                   | 10                                                             | 14                                                    | 24                                                    | 28                                              | 55                                              | 57                                                                        |
| Aminophylline<br>(Theophylline)     | 10                           | 84                      | 63          | 58                          | 21                                                   | 19                                                             | 27                                                    | 18                                                    | 31                                              | 8                                               | 13                                                                        |
| Ampicillin                          | 20                           | 607                     | 536         | 510                         | 1                                                    | 1                                                              | 1                                                     | 1                                                     | 1                                               | 1                                               | 1                                                                         |
| Antipyrine                          | 30                           | 302                     | 301         | 294                         | 97                                                   | 95                                                             | 68                                                    | 167                                                   | 107                                             | 161                                             | 64                                                                        |
| Antipyrine-4-amino                  | 10                           | 222                     | 218         | 169                         | 16                                                   | 13                                                             | 29                                                    | 18                                                    | 17                                              | 17                                              | 13                                                                        |
| Bumetanide                          | 20                           | 599                     | UFO         | N/A                         | 10                                                   | N/A                                                            | N/A                                                   | N/A                                                   | N/A                                             | N/A                                             | N/A                                                                       |
| Cromolyn                            | 20                           | 31                      | UFO         | N/A                         | 2                                                    | N/A                                                            | N/A                                                   | N/A                                                   | N/A                                             | N/A                                             | N/A                                                                       |
| Cymarin                             | 20                           | 59                      | 39          | UFO                         | 8                                                    | N/A                                                            | N/A                                                   | N/A                                                   | N/A                                             | N/A                                             | N/A                                                                       |
| Daunorubicin                        | 20                           | 105                     | UFO         | N/A                         | 12                                                   | N/A                                                            | N/A                                                   | N/A                                                   | N/A                                             | N/A                                             | N/A                                                                       |
| Dihydroergotamine                   | 30                           | 34                      | 13          | 13                          | 1                                                    | 1                                                              | 1                                                     | 1                                                     | 1                                               | 2                                               | 2                                                                         |
| Doxorubicin                         | 20                           | 59                      | 31          | 31                          | 3                                                    | 3                                                              | 4                                                     | 7                                                     | 3                                               | 6                                               | 6                                                                         |
| Enalapril                           | 20                           | 188                     | 162         | 153                         | 1                                                    | 1                                                              | 57                                                    | 28                                                    | 2                                               | 7                                               | 7                                                                         |
| Enalaprilat                         | 20                           | 333                     | 224         | 222                         | 2                                                    | 2                                                              | 7                                                     | 4                                                     | 4                                               | 11                                              | 11                                                                        |
| Ephedrine                           | 30                           | 242                     | 236         | 177                         | 5                                                    | 5                                                              | 32                                                    | 8                                                     | 38                                              | 16                                              | 16                                                                        |
| Ergocristine                        | 30                           | 14                      | 11          | 7                           | 1                                                    | 1                                                              | 1                                                     | 1                                                     | 1                                               | 4                                               | 4                                                                         |
| Fenoterol                           | 20                           | 322                     | 243         | 228                         | 5                                                    | 5                                                              | 2                                                     | 5                                                     | 4                                               | 4                                               | 3                                                                         |
| Tyramine<br>(Hydroxyphenethylamine) | 10                           | 163                     | 161         | 77                          | 166                                                  | 77                                                             | 77                                                    | 77                                                    | 14                                              | 27                                              | 22                                                                        |
| Ketorolac                           | 20                           | 334                     | 309         | 306                         | 37                                                   | 35                                                             | 39                                                    | 14                                                    | 19                                              | 7                                               | 4                                                                         |
| Leucine Enkephalin                  | 20                           | 51                      | 12          | 11                          | 2                                                    | 2                                                              | 2                                                     | 3                                                     | 2                                               | 2                                               | 2                                                                         |

|                       |    |     |     |     |     |     |     |     |     |     |     |     |
|-----------------------|----|-----|-----|-----|-----|-----|-----|-----|-----|-----|-----|-----|
| Methionine Enkephalin | 20 | 64  | 16  | 15  | 1   | 1   | 1   | 1   | 1   | 1   | 1   | 1   |
| Methotrexate          | 20 | 636 | 242 | 237 | 116 | 42  | 49  | 8   | 12  | 9   | 9   | 9   |
| Methylergonovine      | 30 | 500 | 373 | 371 | 1   | 1   | 2   | 2   | 3   | 2   | 2   | 2   |
| Norpropoxyphene       | 10 | 377 | 368 | 317 | 15  | 12  | 30  | 8   | 20  | 6   | 6   | 6   |
| Noscapine             | 30 | 246 | 205 | 196 | 3   | 3   | 82  | 39  | 156 | 38  | 39  | 39  |
| Oxybutynin            | 30 | 84  | 67  | 59  | 6   | 5   | 3   | 1   | 3   | 1   | 1   | 1   |
| Oxytetracycline       | 20 | 451 | 53  | 53  | 4   | 4   | 1   | 1   | 1   | 1   | 1   | 1   |
| Perindopril           | 20 | 51  | 42  | 30  | 2   | 1   | 2   | 2   | 12  | 3   | 3   | 3   |
| Piperacetazine        | 30 | 465 | 261 | 260 | 1   | 1   | 1   | 1   | 1   | 1   | 1   | 1   |
| Poldine               | 30 | 680 | 651 | 649 | 19  | 19  | 22  | 21  | 71  | 13  | 14  | 14  |
| Prazosin              | 40 | 149 | 114 | 112 | 4   | 4   | 3   | 36  | 2   | 43  | 42  | 42  |
| Prednisolone          | 20 | 222 | 192 | 161 | 13  | 11  | 4   | 1   | 7   | 2   | 2   | 2   |
| Prednisone            | 20 | 315 | 267 | 234 | 6   | 5   | 7   | 4   | 14  | 4   | 4   | 4   |
| Prolintane            | 20 | 105 | 104 | 67  | 9   | 5   | 13  | 11  | 11  | 17  | 12  | 12  |
| Sulfadimethoxine      | 30 | 90  | 69  | 66  | 18  | 15  | 4   | 3   | 4   | 3   | 3   | 3   |
| Taurocholate          | 20 | 54  | 42  | UFO | 4   | N/A |
| Tenoxicam             | 20 | 28  | 24  | 24  | 1   | 1   | 1   | 1   | 1   | 1   | 1   | 1   |
| Terbutaline           | 20 | 170 | 155 | 145 | 31  | 25  | 23  | 23  | 15  | 24  | 28  | 28  |
| <b>Median</b>         |    |     |     |     | 6   | 5   | 6   | 6   | 7   | 5   | 4   | 4   |
| <b>Average</b>        |    | 253 | 195 | 180 | 19  | 13  | 18  | 17  | 18  | 15  | 12  | 12  |
| <b>STD</b>            |    |     |     |     | 36  | 21  | 23  | 31  | 32  | 29  | 16  | 16  |

UFO – Unknown Filtered Out



Table S7. Rankings for New Bins

| Test Compound                       | 22%<br>prec<br>CID<br>energy | Bin Size | After pre<br>filters | After RI | After RI and<br>ECOM <sub>50</sub> | MetFrag<br>peaks rank<br>after pre<br>filters (22%<br>prec CID<br>spectra) | MetFrag<br>peaks rank<br>after RI and<br>ECOM <sub>50</sub> (22%<br>prec CID<br>spectra) | MetFrag<br>score rank<br>(intensity<br>corrected<br>composite<br>spectra) |
|-------------------------------------|------------------------------|----------|----------------------|----------|------------------------------------|----------------------------------------------------------------------------|------------------------------------------------------------------------------------------|---------------------------------------------------------------------------|
| 6a-Methylprednisolone               | 20                           | 4099     | 2389                 | 2131     | 1819                               | 51                                                                         | 43                                                                                       | 16                                                                        |
| Adiphenine                          | 20                           | 3657     | 2642                 | 2533     | 2452                               | 7                                                                          | 7                                                                                        | 7                                                                         |
| Albuterol                           | 20                           | 1679     | 1356                 | 1093     | 943                                | 82                                                                         | 73                                                                                       | 35                                                                        |
| Amfenac                             | 30                           | 2162     | 1334                 | 958      | 927                                | 32                                                                         | 22                                                                                       | 152                                                                       |
| Aminophylline (Theophylline)        | 10                           | 718      | 295                  | 218      | 200                                | 89                                                                         | 70                                                                                       | 40                                                                        |
| Ampicillin                          | 20                           | 6828     | 3249                 | 2874     | 2734                               | 1                                                                          | 1                                                                                        | 1                                                                         |
| Antipyrine                          | 30                           | 1868     | 1490                 | 1476     | 1423                               | 388                                                                        | 373                                                                                      | 347                                                                       |
| Antipyrine-4-amino                  | 10                           | 1881     | 1447                 | 1410     | 1182                               | 289                                                                        | 262                                                                                      | 133                                                                       |
| Dihydroergotamine                   | 30                           | 493      | 302                  | 203      | 152                                | 5                                                                          | 3                                                                                        | 3                                                                         |
| Doxorubicin                         | 20                           | 795      | 223                  | 124      | 122                                | 6                                                                          | 6                                                                                        | 7                                                                         |
| Enalapril                           | 20                           | 3854     | 2111                 | 1885     | 1785                               | 706                                                                        | 644                                                                                      | 30                                                                        |
| Enalaprilat                         | 20                           | 3976     | 2458                 | 1924     | 1804                               | 58                                                                         | 52                                                                                       | 36                                                                        |
| Ephedrine                           | 30                           | 1803     | 1410                 | 1371     | 966                                | 231                                                                        | 225                                                                                      | 101                                                                       |
| Ergocristine                        | 30                           | 328      | 189                  | 100      | 81                                 | 2                                                                          | 1                                                                                        | 10                                                                        |
| Fenoterol                           | 20                           | 3272     | 2071                 | 1631     | 1534                               | 3                                                                          | 3                                                                                        | 20                                                                        |
| Tyramine<br>(Hydroxyphenethylamine) | 10                           | 922      | 788                  | 770      | 218                                | 788                                                                        | 218                                                                                      | 39                                                                        |
| Ketorolac                           | 20                           | 2162     | 1334                 | 1145     | 1136                               | 146                                                                        | 136                                                                                      | 54                                                                        |
| Leucine Enkephalin                  | 20                           | 879      | 462                  | 173      | 138                                | 2                                                                          | 2                                                                                        | 14                                                                        |
| Methionine Enkephalin               | 20                           | 659      | 282                  | 98       | 88                                 | 1                                                                          | 1                                                                                        | 10                                                                        |
| Methotrexate                        | 20                           | 6332     | 4114                 | 1678     | 1655                               | 697                                                                        | 301                                                                                      | 11                                                                        |
| Methylergonovine                    | 30                           | 6286     | 4780                 | 3597     | 3526                               | 8                                                                          | 8                                                                                        | 7                                                                         |
| Norpropoxyphene                     | 10                           | 2471     | 1909                 | 1819     | 1549                               | 192                                                                        | 154                                                                                      | 51                                                                        |

|                  |    |      |      |      |      |      |     |     |
|------------------|----|------|------|------|------|------|-----|-----|
| Noscapine        | 30 | 5801 | 1662 | 1470 | 1439 | 619  | 553 | 135 |
| Oxybutynin       | 30 | 1819 | 871  | 658  | 608  | 15   | 14  | 4   |
| Oxytetracycline  | 20 | 3679 | 1702 | 394  | 386  | 8    | 8   | 6   |
| Perindopril      | 20 | 2256 | 676  | 561  | 491  | 22   | 19  | 7   |
| Piperacetazine   | 30 | 5115 | 2899 | 1825 | 1803 | 1    | 1   | 1   |
| Poldine*         | 30 | 5102 | 4084 | 3802 | 3723 | 14   | 14  | 14  |
| Prazosin         | 40 | 2509 | 1223 | 1022 | 1019 | 32   | 30  | 407 |
| Prednisolone     | 20 | 4315 | 2480 | 2252 | 1941 | 25   | 21  | 18  |
| Prednisone       | 20 | 4604 | 2364 | 1823 | 1636 | 69   | 64  | 40  |
| Prolintane       | 20 | 1006 | 878  | 869  | 579  | 157  | 120 | 54  |
| Sulfadimethoxine | 30 | 1754 | 481  | 325  | 307  | 10   | 10  | 8   |
| Tenoxicam        | 20 | 871  | 124  | 112  | 106  | 4    | 4   | 4   |
| Terbutaline      | 20 | 1477 | 1148 | 1031 | 966  | 113  | 104 | 121 |
| <b>MEDIAN</b>    |    |      |      |      |      | 28.5 | 22  | 18  |
| <b>AVERAGE</b>   |    |      | 1635 | 1296 | 1184 | 142  | 102 | 56  |
| <b>STD</b>       |    |      |      |      |      | 228  | 157 | 91  |

**Table S8. Estimated MetFrag rankings for smallest RI and ECOM<sub>50</sub> windows**

| <b>Test Compound</b>             | <b>% compounds remaining at ECOM<sub>50</sub> = ± 0.5 and RI = ± 40</b> | <b>MetFrag score rank (intensity corrected composite spectra)</b> | <b>MetFrag peaks rank (intensity corrected composite spectra)</b> |
|----------------------------------|-------------------------------------------------------------------------|-------------------------------------------------------------------|-------------------------------------------------------------------|
| 6a-Methylprednisolone            | 16.6                                                                    | 5                                                                 | 35                                                                |
| Adiphenine                       | 12.3                                                                    | 5                                                                 | 17                                                                |
| Albuterol                        | 5.2                                                                     | 8                                                                 | 7                                                                 |
| Amfenac                          | 12.0                                                                    | 28                                                                | 11                                                                |
| Aminophylline (Theophylline)     | 12.5                                                                    | 8                                                                 | 17                                                                |
| Ampicillin                       | 7.6                                                                     | 1                                                                 | 1                                                                 |
| Antipyrine                       | 21.1                                                                    | 93                                                                | 160                                                               |
| Antipyrine-4-amino               | 3.7                                                                     | 7                                                                 | 5                                                                 |
| Dihydroergotamine                | 24.5                                                                    | 3                                                                 | 3                                                                 |
| Doxorubicin                      | 11.2                                                                    | 6                                                                 | 5                                                                 |
| Enalapril                        | 10.4                                                                    | 9                                                                 | 10                                                                |
| Enalaprilat                      | 10.7                                                                    | 6                                                                 | 5                                                                 |
| Ephedrine                        | 21.4                                                                    | 24                                                                | 45                                                                |
| Ergocristine                     | 12.2                                                                    | 3                                                                 | 1                                                                 |
| Fenoterol                        | 2.8                                                                     | 13                                                                | 6                                                                 |
| Tyramine (Hydroxyphenethylamine) | 3.9                                                                     | 14                                                                | 10                                                                |
| Ketorolac                        | 28.8                                                                    | 20                                                                | 24                                                                |
| Leucine Enkephalin               | 7.6                                                                     | 4                                                                 | 2                                                                 |
| Methionine Enkephalin            | 2.8                                                                     | 2                                                                 | 1                                                                 |
| Methotrexate                     | 31.6                                                                    | 10                                                                | 29                                                                |
| Methylergonovine                 | 5.0                                                                     | 2                                                                 | 2                                                                 |
| Norpropoxyphene                  | 7.9                                                                     | 10                                                                | 29                                                                |
| Noscapine                        | 4.7                                                                     | 5                                                                 | 42                                                                |
| Oxybutynin                       | 17.5                                                                    | 4                                                                 | 11                                                                |
| Oxytetracycline                  | 1.9                                                                     | 2                                                                 | 6                                                                 |
| Perindopril                      | 9.8                                                                     | 3                                                                 | 19                                                                |
| Piperacetazine                   | 10.0                                                                    | 1                                                                 | 1                                                                 |
| Poldine*                         | 14.6                                                                    | 12                                                                | 148                                                               |
| Prazosin                         | 16.6                                                                    | 170                                                               | 6                                                                 |
| Prednisolone                     | 14.2                                                                    | 4                                                                 | 15                                                                |
| Prednisone                       | 10.4                                                                    | 11                                                                | 32                                                                |
| Prolintane                       | 29.4                                                                    | 31                                                                | 32                                                                |
| Sulfadimethoxine                 | 16.0                                                                    | 5                                                                 | 5                                                                 |
| Tenoxicam                        | 25.8                                                                    | 4                                                                 | 4                                                                 |
| Terbutaline                      | 7.1                                                                     | 11                                                                | 17                                                                |

---

|                |      |      |
|----------------|------|------|
| <b>AVERAGE</b> | 15.5 | 21.8 |
| <b>MEDIAN</b>  | 6    | 10   |
| <b>STD</b>     | 31.3 | 35.3 |

---

|       |      |      |      |      |      |          |
|-------|------|------|------|------|------|----------|
| 10.44 | 8.34 | 9.2  | 8.21 | 8.17 | 7.02 | VP.0     |
| 8.03  | 8.42 | 9.13 | 7.72 | 8.6  | 8.4  | VABC     |
| 7.96  | 6.17 | 8.08 | 6.37 | 6.04 | 6.7  | ECCEN    |
| 7.37  | 6.64 | 7.8  | 6.94 | 7.72 | 5.37 | apol     |
| 7.24  | 5.48 | 5.1  | 5.71 | 4.17 | 7.04 | MOMI.Y   |
| 6.6   | 6.55 | 5.8  | 7.49 | 7.5  | 6.4  | MobCSA   |
| 6.42  | 6.65 | 6.95 | 5.86 | 6.39 | 7.1  | WPATH    |
| 6.39  | 7.28 | 5.76 | 4.93 | 5.63 | 4.96 | VP.1     |
| 6.37  | 6.81 | 6.79 | 6.81 | 7.02 | 6.54 | SP.1     |
| 6.26  | 6.32 | 5.13 | 5.63 | 4.68 | 4.53 | GRAVH.2  |
| 6.23  | 5.93 | 5.88 | 5.26 | 4.68 | 4.36 | GRAVH.1  |
| 6.17  | 5.01 | 4.12 | 4.27 | 5.53 | 5.26 | WA.unity |
| 5.86  | 5.91 | 6.23 | 4.83 | 4.57 | 5.52 | WTPT.1   |
| 5.81  | 5.87 | 5.84 | 5.73 | 5.79 | 6.12 | SP.0     |
| 5.81  | 5.34 | 4.92 | 5.37 | 4.92 | 6.99 | MOMI.X   |
| 5.55  | 5    | 4.86 | 5.91 | 5.76 | 4.26 | WV.unity |
| 5.37  | 5.43 | 5.51 | 5.28 | 4.06 | 5.3  | VAdjMat  |
| 5.19  | 4.98 | 5.79 | 5.98 | 3.79 | 5.76 | nB       |
| 5.02  | 4.84 | 3.22 | 4.4  | 3.98 | 5.17 | WT.unity |
| 5.01  | 5.3  | 3.5  | 5.49 | 4.13 | 4.15 | ATSp1    |
| 4.94  | 5.22 | 4.21 | 5.29 | 4.66 | 4.73 | GRAVH.3  |
| 4.84  | 3.66 | 4.96 | 3.83 | 4.3  | 3.56 | nAtom    |
| 4.65  | 4.81 | 5.69 | 4.04 | 5.49 | 4.15 | Kier1    |
| 4.52  | 3.55 | 4.55 | 6.43 | 6.12 | 3.98 | WPSA.1   |
| 4.26  | 4.83 | 4.83 | 3.71 | 4.22 | 3.89 | Zagreb   |
| 4.19  | 4.08 | 3.78 | 3.84 | 3.61 | 4.23 | MOMI.Z   |
| 4.16  | 2.74 | 3.73 | 3.27 | 3.68 | 4.93 | ATSm1    |
| 4     | 3.24 | 3.52 | 4.34 | 3.94 | 4.85 | SP.2     |
| 3.99  | 4.54 | 3.17 | 3.7  | 5.04 | 4.99 | ATSp2    |
| 3.87  | 2.93 | 3.48 | 3.65 | 3.76 | 5.38 | GRAV.6   |
| 3.78  | 2.66 | 4.05 | 4.76 | 4.17 | 3.88 | MOMI.R   |
| 3.53  | 3.39 | 3.35 | 3.57 | 3.57 | 4.42 | GRAV.5   |
| 3.34  | 1.44 | 3.61 | 3.22 | 3.3  | 3.7  | Kier2    |
| 3.19  | 3.06 | 4.29 | 4.24 | 4.5  | 3.29 | VP.2     |
| 3.16  | 2.46 | 3.6  | 3.35 | 4.1  | 4.55 | ATSm2    |
| 3.12  | 3.37 | 3.24 | 4.47 | 2.93 | 3.51 | SP.4     |
| 3     | 2.74 | 3.19 | 3.03 | 4.12 | 4.2  | VP.7     |
| 2.92  | 4.44 | 3.02 | 2.17 | 3.4  | 2.57 | fragC    |
| 2.56  | 2.29 | 2.61 | 3.74 | 4.18 | 4.9  | SP.3     |
| 2.27  | 3.32 | 3.68 | 3.75 | 4.5  | 4.92 | GRAV.4   |
| 1.96  | 1.88 | 2.82 | 3.25 | 3.67 | 1.14 | VP.3     |
| Full  | CV1  | CV2  | CV3  | CV4  | CV5  |          |

Fig S1. Relative descriptor importance for 5 cross validation replicates
